# Supplementary material for: Risk of cancer after primary total hip replacement: The influence of bearings, cementation and the material of the stem: A retrospective cohort study of 8,343 patients with 9 years average follow-up from Valdoltra Orthopaedic Hospital, Slovenia
Source: PubMed Central journal article supplement — Acta Orthop. 2018 Feb 1;89(2):234–9. doi: 10.1080/17453674.2018.1431854 (PMC5901524; doi:10.1080/17453674.2018.1431854), 2018-02-01
Supplement: IORT_A_1431854_SM8591.pdf [file IORT_A_1431854_SM8591.pdf]

## Supplementary data

Table 3. Standardized incidence ratio (SIR) analysis of the complete cohort and sub-cohorts divided by bearings into: non-metal-on-metal (non-MoM), metal-on-metal (MoM)

| Primary site (ICD-10)                 | Whole cohort |        |                               | non-MoM bearings |        |                               | MoM bearings |      |                               |
|---------------------------------------|--------------|--------|-------------------------------|------------------|--------|-------------------------------|--------------|------|-------------------------------|
|                                       | Obs          | Exp    | SIR (95% CI)                  | Obs              | Exp    | SIR (95% CI)                  | Obs          | Exp  | SIR (95% CI)                  |
| All sites (C00–C96)                   | 1,405        | 1438.4 | 0.98 (0.93–1.03)              | 1,329            | 1372.0 | 0.97 (0.92–1.02)              | 76           | 66.4 | 1.14 (0.91–1.43)              |
| Melanoma (C43)                        | 35           | 39.5   | 0.89 (0.64–1.23)              | 34               | 37.6   | 0.90 (0.65–1.27)              | 1            | 1.9  | 0.52 (0.07–3.71)              |
| Corpus uteri (C54)                    | 38           | 38.5   | 0.99 (0.72–1.36)              | 38               | 36.3   | 1.05 (0.76–1.44)              | 0            | 2.2  | 0.00                          |
| Prostate (C61)                        | 194          | 144.1  | 1.35 (1.17–1.55) <sup>a</sup> | 180              | 138.3  | 1.30 (1.13–1.51) <sup>a</sup> | 14           | 5.9  | 2.41 (1.43–4.08) <sup>a</sup> |
| Hematolymphatic cancers (C81–C96)     | 71           | 104.4  | 0.68 (0.54–0.86) <sup>a</sup> | 69               | 99.9   | 0.69 (0.54–0.87) <sup>a</sup> | 2            | 4.5  | 0.45 (0.11–1.80)              |
| Stomach (C16)                         | 58           | 69.1   | 0.84 (0.65–1.09)              | 56               | 66.0   | 0.85 (0.65–1.10)              | 2            | 3.0  | 0.66 (0.16–2.63)              |
| Lung and bronchi (C33–C34)            | 126          | 152.4  | 0.83 (0.69–0.98) <sup>a</sup> | 121              | 144.5  | 0.84 (0.70–1.00)              | 5            | 7.9  | 0.63 (0.26–1.51)              |
| Breast (C50)                          | 125          | 123.6  | 1.01 (0.85–1.21)              | 117              | 116.8  | 1.00 (0.84–1.20)              | 8            | 6.8  | 1.17 (0.59–2.34)              |
| Lymphomas (C81–C85)                   | 31           | 39.2   | 0.79 (0.56–1.12)              | 29               | 37.5   | 0.77 (0.54–1.11)              | 2            | 1.7  | 1.16 (0.29–4.64)              |
| Gastrointestinal tract (C15–C20)      | 229          | 284.9  | 0.80 (0.71–0.92) <sup>a</sup> | 217              | 271.7  | 0.80 (0.70–0.91) <sup>a</sup> | 12           | 13.1 | 0.91 (0.52–1.61)              |
| Urotract (C64–C67)                    | 89           | 83.8   | 1.06 (0.86–1.31)              | 83               | 80.0   | 1.04 (0.84–1.29)              | 6            | 3.9  | 1.56 (0.70–3.46)              |
| Kidney and renal pelvis (C64–C65)     | 51           | 37.8   | 1.35 (1.03–1.78) <sup>a</sup> | 48               | 35.9   | 1.34 (1.01–1.77) <sup>a</sup> | 3            | 1.9  | 1.60 (0.51–4.95)              |
| Bladder (C67)                         | 38           | 43.8   | 0.87 (0.63–1.19)              | 35               | 41.9   | 0.83 (0.60–1.16)              | 3            | 1.9  | 1.60 (0.51–4.95)              |
| Liver (C22)                           | 16           | 22.6   | 0.71 (0.43–1.16)              | 16               | 21.5   | 0.75 (0.46–1.22)              | 0            | 1.1  | 0.00                          |
| Central nervous system (C70–C72)      | 14           | 12.0   | 1.16 (0.69–1.96)              | 14               | 11.3   | 1.23 (0.73–2.08)              | 0            | 0.7  | 0.00                          |
| Plasmacytoma (C90)                    | 13           | 16.6   | 0.78 (0.45–1.35)              | 13               | 15.9   | 0.82 (0.48–1.41)              | 0            | 0.7  | 0.00                          |
| Leukemias (C91–C95)                   | 13           | 31.3   | 0.41 (0.24–0.71) <sup>a</sup> | 13               | 30.0   | 0.43 (0.25–0.75) <sup>a</sup> | 0            | 1.4  | 0.00                          |
| Colon and rectum (C18–C20)            | 165          | 201.1  | 0.82 (0.70–0.96) <sup>a</sup> | 155              | 191.8  | 0.81 (0.69–0.95) <sup>a</sup> | 10           | 9.3  | 1.08 (0.58–2.00)              |
| Liver and gall bladder (C22–C23)      | 35           | 33.7   | 1.04 (0.75–1.45)              | 35               | 32.2   | 1.09 (0.78–1.51)              | 0            | 1.5  | 0.00                          |
| Pancreas (C25)                        | 47           | 47.6   | 0.99 (0.74–1.31)              | 45               | 45.6   | 0.99 (0.74–1.32)              | 2            | 2.0  | 1.00 (0.25–4.01)              |
| Skin cancer other than melanoma (C44) | 301          | 285    | 1.06 (0.94–1.18)              | 283              | 273.6  | 1.03 (0.92–1.16)              | 18           | 11.4 | 1.58 (0.99–2.50)              |

Abbreviations: Obs = observed number of cases; Exp = expected number of cases; CI = 95% confidence interval.

<sup>a</sup> p < 0.05.

Table 4. Standardized incidence ratio (SIR) analysis of the sub-cohorts divided by stem material into: titanium alloy (Ti-alloy), cobalt chrome alloy (CoCr-alloy), stainless steel (Fe-alloy); and by use of bone cement into non-cemented and cemented

| Stem material:<br>Primary site (ICD-10) | Ti-alloy |              |                               | CoCr-alloy |          |                               | Fe-alloy |      |                  |
|-----------------------------------------|----------|--------------|-------------------------------|------------|----------|-------------------------------|----------|------|------------------|
|                                         | Obs      | Exp          | SIR (95% CI)                  | Obs        | Exp      | SIR (95% CI)                  | Obs      | Exp  | SIR (95% CI)     |
| All sites (C00–C96)                     | 1,220    | 1,239.2      | 0.98 (0.93–1.04)              | 156        | 163.6    | 0.95 (0.82–1.12)              | 29       | 35.6 | 0.81 (0.57–1.17) |
| Melanoma (C43)                          | 30       | 34.6         | 0.87 (0.61–1.24)              | 4          | 4.0      | 1.00 (0.37–2.66)              | 1        | 0.9  | 1.13 (0.16–8.01) |
| Corpus uteri (C54)                      | 32       | 33.7         | 0.95 (0.67–1.34)              | 5          | 3.9      | 1.29 (0.54–3.10)              | 1        | 1.0  | 1.02 (0.14–7.26) |
| Prostate (C61)                          | 185      | 131.1        | 1.41 (1.22–1.63) <sup>a</sup> | 9          | 11.8     | 0.76 (0.40–1.47)              | 0        | 1.2  | 0.00             |
| Hematolymphatic cancers (C81–C96)       | 58       | 87.7         | 0.66 (0.51–0.86) <sup>a</sup> | 11         | 13.7     | 0.80 (0.44–1.45)              | 2        | 3.0  | 0.68 (0.17–2.70) |
| Stomach (C16)                           | 49       | 57.9         | 0.84 (0.64–1.12)              | 8          | 9.2      | 0.87 (0.43–1.73)              | 1        | 1.9  | 0.52 (0.07–3.72) |
| Lung and bronchi (C33–C34)              | 112      | 134.6        | 0.83 (0.69–1.00)              | 11         | 14.7     | 0.75 (0.41–1.35)              | 3        | 3.2  | 0.95 (0.31–2.94) |
| Breast (C50)                            | 107      | 106.7        | 1.00 (0.83–1.21)              | 14         | 13.5     | 1.04 (0.61–1.75)              | 4        | 3.4  | 1.18 (0.44–3.15) |
| Lymphomas (C81–C85)                     | 25       | 33.3         | 0.75 (0.51–1.11)              | 4          | 4.9      | 0.82 (0.31–2.19)              | 2        | 1.0  | 1.92 (0.48–7.67) |
| Gastrointestinal tract (C15–C20)        | 199      | 243.9        | 0.82 (0.71–0.94) <sup>a</sup> | 27         | 33.8     | 0.80 (0.55–1.17)              | 3        | 7.1  | 0.42 (0.14–1.30) |
| Urotract (C64–C67)                      | 78       | 71.9         | 1.08 (0.87–1.35)              | 7          | 9.8      | 0.72 (0.34–1.50)              | 4        | 2.1  | 1.89 (0.71–5.03) |
| Kidney and renal pelvis (C64–C65)       | 46       | 33.2         | 1.39 (1.04–1.85) <sup>a</sup> | 4          | 3.8      | 1.06 (0.40–2.82)              | 1        | 0.8  | 1.21 (0.17–8.56) |
| Bladder (C67)                           | 32       | 36.9         | 0.87 (0.61–1.23)              | 3          | 5.7      | 0.53 (0.17–1.63)              | 3        | 1.2  | 2.44 (0.79–7.57) |
| Liver (C22)                             | 16       | 19.9         | 0.81 (0.49–1.32)              | 0          | 2.2      | 0.00                          | 0        | 0.5  | 0.00             |
| Central nervous system (C70–C72)        | 13       | 10.9         | 1.20 (0.69–2.06)              | 1          | 1.0      | 1.04 (0.15–7.39)              | 0        | 0.2  | 0.00             |
| Plasmacytoma (C90)                      | 12       | 14.2         | 0.85 (0.48–1.49)              | 1          | 2.0      | 0.49 (0.07–3.49)              | 0        | 0.4  | 0.00             |
| Leukemias (C91–C95)                     | 9        | 26.2         | 0.34 (0.18–0.66) <sup>a</sup> | 4          | 4.2      | 0.94 (0.35–2.51)              | 0        | 0.9  | 0.00             |
| Colon and rectum (C18–C20)              | 144      | 173.1        | 0.83 (0.71–0.98) <sup>a</sup> | 19         | 23.0     | 0.83 (0.53–1.29)              | 2        | 4.9  | 0.41 (0.10–1.62) |
| Liver and gall bladder (C22–C23)        | 34       | 28.9         | 1.18 (0.84–1.64)              | 1          | 3.9      | 0.25 (0.04–1.80)              | 0        | 0.8  | 0.00             |
| Pancreas (C25)                          | 41       | 40.0         | 1.03 (0.75–1.39)              | 5          | 6.3      | 0.80 (0.33–1.91)              | 1        | 1.4  | 0.74 (0.10–5.25) |
| Skin cancer other than melanoma (C44)   | 245      | 238.2        | 1.03 (0.91–1.16)              | 49         | 38.3     | 1.28 (0.97–1.69)              | 7        | 8.5  | 0.83 (0.39–1.73) |
| <b>Use of bone cement:</b>              |          |              |                               |            |          |                               |          |      |                  |
| Primary site (ICD-10)                   | Obs      | Non-cemented |                               | Obs        | Cemented |                               |          |      |                  |
|                                         |          | Exp          | SIR (95% CI)                  |            | Exp      | SIR (95% CI)                  |          |      |                  |
| All sites (C00–C96)                     | 1,156    | 1,170.2      | 0.99 (0.93–1.05)              | 249        | 268.2    | 0.93 (0.82–1.05)              |          |      |                  |
| Melanoma (C43)                          | 29       | 32.9         | 0.88 (0.61–1.26)              | 6          | 6.6      | 0.91 (0.41–2.03)              |          |      |                  |
| Corpus uteri (C54)                      | 28       | 31.7         | 0.88 (0.61–1.28)              | 10         | 6.8      | 1.47 (0.79–2.74)              |          |      |                  |
| Prostate (C61)                          | 178      | 127.2        | 1.40 (1.21–1.62) <sup>a</sup> | 16         | 16.9     | 0.95 (0.58–1.55)              |          |      |                  |
| Hematolymphatic cancers (C81–C96)       | 54       | 82.2         | 0.66 (0.50–0.86) <sup>a</sup> | 17         | 22.2     | 0.77 (0.48–1.23)              |          |      |                  |
| Stomach (C16)                           | 49       | 54.1         | 0.91 (0.68–1.20)              | 9          | 15.0     | 0.60 (0.31–1.16)              |          |      |                  |
| Lung and bronchi (C33–C34)              | 109      | 128.0        | 0.85 (0.71–1.03)              | 17         | 24.4     | 0.70 (0.43–1.12)              |          |      |                  |
| Breast (C50)                            | 102      | 100.2        | 1.02 (0.84–1.24)              | 23         | 23.4     | 0.98 (0.65–1.48)              |          |      |                  |
| Lymphomas (C81–C85)                     | 22       | 31.3         | 0.70 (0.46–1.07)              | 9          | 7.9      | 1.14 (0.59–2.20)              |          |      |                  |
| Gastrointestinal tract (C15–C20)        | 190      | 229.6        | 0.83 (0.72–0.95) <sup>a</sup> | 39         | 55.3     | 0.71 (0.52–0.97) <sup>a</sup> |          |      |                  |
| Urotract (C64–C67)                      | 76       | 67.9         | 1.12 (0.89–1.40)              | 13         | 16.0     | 0.81 (0.47–1.40)              |          |      |                  |
| Kidney and renal pelvis (C64–C65)       | 46       | 31.5         | 1.46 (1.09–1.95) <sup>a</sup> | 5          | 6.2      | 0.80 (0.33–1.93)              |          |      |                  |
| Bladder (C67)                           | 30       | 34.6         | 0.87 (0.61–1.24)              | 8          | 9.3      | 0.86 (0.43–1.73)              |          |      |                  |
| Liver (C22)                             | 14       | 18.9         | 0.74 (0.44–1.25)              | 2          | 3.7      | 0.54 (0.14–2.16)              |          |      |                  |
| Central nervous system (C70–C72)        | 11       | 10.4         | 1.06 (0.58–1.91)              | 3          | 1.6      | 1.86 (0.60–5.76)              |          |      |                  |
| Plasmacytoma (C90)                      | 12       | 13.3         | 0.90 (0.51–1.59)              | 1          | 3.3      | 0.30 (0.04–2.15)              |          |      |                  |
| Leukemias (C91–C95)                     | 8        | 24.5         | 0.33 (0.16–0.65) <sup>a</sup> | 5          | 6.9      | 0.73 (0.30–1.75)              |          |      |                  |
| Colon and rectum (C18–C20)              | 135      | 163.3        | 0.83 (0.70–0.98) <sup>a</sup> | 30         | 37.8     | 0.80 (0.56–1.14)              |          |      |                  |
| Liver and gall bladder (C22–C23)        | 32       | 27.3         | 1.17 (0.83–1.66)              | 3          | 6.5      | 0.46 (0.15–1.44)              |          |      |                  |
| Pancreas (C25)                          | 39       | 37.5         | 1.04 (0.76–1.42)              | 8          | 10.2     | 0.79 (0.39–1.57)              |          |      |                  |
| Skin cancer other than melanoma (C44)   | 226      | 223.1        | 1.01 (0.89–1.15)              | 75         | 61.9     | 1.21 (0.97–1.52)              |          |      |                  |

Abbreviations: Obs = observed number of cases; Exp = expected number of cases; CI = 95% confidence interval.

<sup>a</sup> p < 0.05.

Table 5. Poisson analysis of the sub-cohorts divided by bearings: metal-on-metal (MoM) relative to non-metal-on-metal (non-MoM); by stem material: cobalt chrome alloy (CoCr), stainless steel (Fe) relative to titanium alloy (Ti); by use of bone cement (cemented relative to non-cemented)

| Primary site (ICD-10)                 | Bearings                      |                  | Stem material          |                      | Use of bone cement<br>cemented/non-cemented<br>RR (95% CI) |
|---------------------------------------|-------------------------------|------------------|------------------------|----------------------|------------------------------------------------------------|
|                                       | MoM/non-MoM<br>RR (95% CI)    | RR (95% CI)      | CoCr/Ti<br>RR (95% CI) | Fe/Ti<br>RR (95% CI) |                                                            |
| All sites (C00–C96)                   | 1.56 (1.23–1.95) <sup>a</sup> | 0.93 (0.79–1.10) | 0.75 (0.52–1.08)       | 0.92 (0.81–1.06)     |                                                            |
| Melanoma (C43)                        | 0.78 (0.11–5.69)              | 0.99 (0.35–2.81) | 1.06 (0.14–7.76)       | 0.91 (0.38–2.20)     |                                                            |
| Corpus uteri (C54)                    |                               | 1.27 (0.50–3.27) | 0.95 (0.13–6.99)       | 1.60 (0.78–3.30)     |                                                            |
| Prostate (C61)                        | 2.02 (1.17–3.48) <sup>a</sup> | 0.61 (0.31–1.19) |                        | 0.80 (0.48–1.33)     |                                                            |
| Hematolymphatic cancers (C81–C96)     | 0.83 (0.20–3.40)              | 1.19 (0.63–2.27) | 0.93 (0.23–3.81)       | 1.17 (0.68–2.02)     |                                                            |
| Stomach (C16)                         | 1.02 (0.25–4.17)              | 1.04 (0.49–2.20) | 0.57 (0.08–4.15)       | 0.69 (0.34–1.40)     |                                                            |
| Lung and bronchi (C33–C34)            | 1.02 (0.42–2.48)              | 0.88 (0.47–1.64) | 1.05 (0.33–3.32)       | 0.82 (0.49–1.38)     |                                                            |
| Breast (C50)                          | 1.71 (0.83–3.49)              | 0.93 (0.54–1.63) | 0.98 (0.36–2.66)       | 0.88 (0.56–1.39)     |                                                            |
| Lymphomas (C81–C85)                   | 1.93 (0.46–8.10)              | 1.06 (0.37–3.04) | 2.28 (0.54–9.61)       | 1.61 (0.74–3.50)     |                                                            |
| Gastrointestinal tract (C15–C20)      | 1.52 (0.85–2.72)              | 0.96 (0.64–1.44) | 0.46 (0.15–1.43)       | 0.86 (0.61–1.21)     |                                                            |
| Urotract (C64–C67)                    | 2.02 (0.88–4.64)              | 0.60 (0.28–1.30) | 1.46 (0.54–4.00)       | 0.68 (0.37–1.22)     |                                                            |
| Kidney and renal pelvis (C64–C65)     | 1.64 (0.51–5.25)              | 0.66 (0.24–1.85) | 0.72 (0.10–5.20)       | 0.49 (0.20–1.24)     |                                                            |
| Bladder (C67)                         | 2.51 (0.77–8.17)              | 0.57 (0.17–1.86) | 2.47 (0.76–8.06)       | 0.96 (0.44–2.09)     |                                                            |
| Liver (C22)                           |                               |                  |                        | 0.82 (0.19–3.62)     |                                                            |
| Central nervous system (C70–C72)      |                               | 1.00 (0.13–7.68) |                        | 2.06 (0.58–7.39)     |                                                            |
| Plasmacytoma (C90)                    |                               | 0.53 (0.07–4.08) |                        | 0.32 (0.04–2.42)     |                                                            |
| Leukemias (C91–C95)                   |                               | 2.71 (0.83–8.77) |                        | 2.25 (0.74–6.89)     |                                                            |
| Colon and rectum (C18–C20)            | 1.75 (0.92–3.32)              | 0.96 (0.59–1.54) | 0.43 (0.11–1.75)       | 0.95 (0.64–1.41)     |                                                            |
| Liver and gall bladder (C22–C23)      |                               | 0.23 (0.03–1.68) |                        | 0.43 (0.13–1.41)     |                                                            |
| Pancreas (C25)                        | 1.29 (0.31–5.32)              | 0.76 (0.30–1.93) | 0.66 (0.09–4.78)       | 0.75 (0.35–1.62)     |                                                            |
| Skin cancer other than melanoma (C44) | 1.92 (1.19–3.10) <sup>a</sup> | 1.24 (0.91–1.69) | 0.74 (0.35–1.57)       | 1.21 (0.93–1.58)     |                                                            |

Abbreviations: RR = relative risk; CI = 95% confidence interval.  
<sup>a</sup> p < 0.05.

Table 6. Poisson analyses mutually adjusted to bearing surface, cementation, and stem material. Bearings: metal-on-metal (MoM) relative to non-metal-on-metal (non-MoM); stem material: cobalt chrome alloy (CoCr), stainless steel (Fe) relative to titanium alloy (Ti); use of bone cement (cemented relative to non-cemented)

| Primary site (ICD-10)                 | Bearings                      |                               | Stem material          |                               | Use of bone cement<br>cemented/non-cemented<br>RR (95% CI) |
|---------------------------------------|-------------------------------|-------------------------------|------------------------|-------------------------------|------------------------------------------------------------|
|                                       | MoM/non-MoM<br>RR (95% CI)    | RR (95% CI)                   | CoCr/Ti<br>RR (95% CI) | Fe/Ti<br>RR (95% CI)          |                                                            |
| All sites (C00–C96)                   | 1.54 (1.22–1.93) <sup>a</sup> | 0.91 (0.68–1.21)              | 0.74 (0.47–1.14)       | 1.04 (0.81–1.34)              |                                                            |
| Melanoma (C43)                        | 0.77 (0.10–5.61)              | 1.47 (0.16–13.2)              | 1.57 (0.10–25.05)      | 0.66 (0.09–4.83)              |                                                            |
| Corpus uteri (C54)                    |                               | 0.56 (0.15–2.09)              | 0.42 (0.05–3.76)       | 2.33 (0.82–6.65)              |                                                            |
| Prostate (C61)                        | 2.07 (1.20–3.57) <sup>a</sup> | 0.32 (0.12–0.87) <sup>a</sup> |                        | 1.87 (0.88–3.99)              |                                                            |
| Hematolymphatic cancers (C81–C96)     | 0.86 (0.21–3.51)              | 0.99 (0.32–3.11)              | 0.77 (0.14–4.22)       | 1.21 (0.44–3.35)              |                                                            |
| Stomach (C16)                         | 0.95 (0.23–3.90)              |                               |                        |                               |                                                            |
| Lung and bronchi (C33–C34)            | 0.99 (0.41–2.43)              | 1.45 (0.40–5.20)              | 1.73 (0.35–8.59)       | 0.60 (0.19–1.88)              |                                                            |
| Breast (C50)                          | 1.68 (0.81–3.45)              | 1.23 (0.44–3.41)              | 1.29 (0.35–4.81)       | 0.77 (0.31–1.90)              |                                                            |
| Lymphomas (C81–C85)                   | 2.19 (0.52–9.33)              | 0.47 (0.11–2.11)              | 1.03 (0.17–6.14)       | 2.50 (0.74–8.41)              |                                                            |
| Gastrointestinal tract (C15–C20)      | 1.48 (0.83–2.66)              | 1.11 (0.52–2.36)              | 0.53 (0.14–1.96)       | 0.87 (0.45–1.70)              |                                                            |
| Urotract (C64–C67)                    | 1.93 (0.84–4.43)              | 1.26 (0.26–6.07)              | 3.12 (0.57–17.0)       | 0.47 (0.12–1.93)              |                                                            |
| Kidney and renal pelvis (C64–C65)     | 1.51 (0.47–4.86)              |                               |                        |                               |                                                            |
| Bladder (C67)                         | 2.56 (0.78–8.41)              | 0.53 (0.09–3.16)              | 2.32 (0.39–13.9)       | 1.14 (0.27–4.78)              |                                                            |
| Liver (C22)                           |                               |                               |                        | 3.13 (0.71–13.8)              |                                                            |
| Central nervous system (C70–C72)      |                               | 0.24 (0.02–2.63)              |                        | 5.87 (1.21–28.5) <sup>a</sup> |                                                            |
| Plasmacytoma (C90)                    |                               |                               |                        |                               |                                                            |
| Leukemias (C91–C95)                   |                               | 1.46 (0.16–13.08)             |                        | 1.90 (0.24–15.2)              |                                                            |
| Colon and rectum (C18–C20)            | 1.74 (0.92–3.31)              | 0.80 (0.36–1.76)              | 0.37 (0.08–1.69)       | 1.24 (0.63–2.44)              |                                                            |
| Liver and gall bladder (C22–C23)      |                               | 0.20 (0.02–2.17)              |                        | 1.15 (0.28–4.79)              |                                                            |
| Pancreas (C25)                        | 1.24 (0.30–5.12)              | 0.90 (0.18–4.66)              | 0.78 (0.07–8.59)       | 0.84 (0.20–3.50)              |                                                            |
| Skin cancer other than melanoma (C44) | 2.01 (1.24–3.25) <sup>a</sup> | 0.92 (0.54–1.56)              | 0.55 (0.23–1.32)       | 1.42 (0.89–2.27)              |                                                            |

Abbreviations: RR = relative risk; CI = 95% confidence interval.  
<sup>a</sup> p < 0.05.
